# Supplementary material
Source: HighWire-hosted journal article supplement (https://bmjopen.bmj.com/content/9/12/e030140)

Supplementary material to:

Associations between metal constituents of ambient particulate matter and mortality in England; an ecological study

**Table S1:** Descriptive statistics of health outcomes, modelled particulate metal concentrations, deprivation score, and ethnicity covariates for the 1533 wards in the study area in 2008-11.

|                                              | 10th centile                                                          | mean   | median | 90th centile | LOOCV* R <sup>2</sup><br>(for LUR**) |
|----------------------------------------------|-----------------------------------------------------------------------|--------|--------|--------------|--------------------------------------|
| Health outcomes                              | Rates of health outcome (number of cases per hundred thousand people) |        |        |              |                                      |
| Cardiovascular mortality                     | 117.50                                                                | 215.97 | 203.20 | 327.87       |                                      |
| Respiratory mortality                        | 42.85                                                                 | 96.34  | 87.85  | 160.41       |                                      |
| Lung cancer incidence                        | 25.06                                                                 | 48.44  | 45.75  | 75.86        |                                      |
| Modelled metal concentrations using LUR      | Metals in ng/m <sup>3</sup>                                           |        |        |              |                                      |
| Cu PM <sub>10</sub>                          | 7.0                                                                   | 13.3   | 13.1   | 19.8         | 0.95                                 |
| Fe PM <sub>10</sub>                          | 223.2                                                                 | 378.9  | 357.0  | 596.7        | 0.95                                 |
| Zn PM <sub>10</sub>                          | 113.5                                                                 | 135.2  | 139.5  | 153.0        | 0.77                                 |
| Cu PM <sub>2.5</sub>                         | 2.6                                                                   | 4.3    | 4.6    | 5.7          | 0.79                                 |
| Fe PM <sub>2.5</sub>                         | 51.6                                                                  | 86.8   | 82.8   | 129.0        | 0.92                                 |
| Area-level confounders                       |                                                                       |        |        |              |                                      |
| Deprivation (modified IMD)                   | 3.45                                                                  | 7.08   | 6.47   | 11.78        |                                      |
| % of Asian                                   | 2                                                                     | 13     | 9      | 33           |                                      |
| % of White                                   | 38                                                                    | 72     | 77     | 95           |                                      |
| Tobacco expenditure (pounds/week/inhabitant) | 3.40                                                                  | 4.61   | 4.48   | 6.03         |                                      |

\*LOOCV Leave one out cross validation

\*\* LUR Land Use Regression

**Table S2:** Poisson regression confounder effects from the two models (i) using metals from PM<sub>10</sub> and (ii) metals from PM<sub>2.5</sub> for all the health outcomes. Mean, lower and upper bound of the 95% credible interval (CI) of the inter-decile relative risk (RR).

| Outcomes                 | Model                                                     | Confounders         | RR    | CI 95%        |
|--------------------------|-----------------------------------------------------------|---------------------|-------|---------------|
| Cardiovascular mortality | All Metals in PM <sub>10</sub><br>VIF <sup>2</sup> =9.14  | IMD <sup>1</sup>    | 1.098 | (1.02,1.182)  |
|                          |                                                           | % Asian             | 0.982 | (0.921,1.046) |
|                          |                                                           | % White             | 0.817 | (0.729,0.915) |
|                          |                                                           | Tobacco expenditure | 1.197 | (1.133,1.265) |
|                          |                                                           | IMD <sup>1</sup>    | 1.095 | (1.02,1.177)  |
|                          | All Metals in PM <sub>2.5</sub><br>VIF <sup>2</sup> =9.04 | % Asian             | 0.987 | (0.926,1.052) |
|                          |                                                           | % White             | 0.824 | (0.737,0.922) |
|                          |                                                           | Tobacco expenditure | 1.192 | (1.135,1.253) |
|                          |                                                           | IMD <sup>1</sup>    | 1.188 | (1.073,1.315) |
|                          |                                                           |                     |       |               |

|                                                           |                                                           |                     |                  |               |
|-----------------------------------------------------------|-----------------------------------------------------------|---------------------|------------------|---------------|
| Respiratory mortality                                     | All Metals in PM <sub>10</sub><br>VIF <sup>2</sup> =8.93  | % Asian             | 0.887            | (0.813,0.967) |
|                                                           |                                                           | % White             | 0.822            | (0.704,0.959) |
|                                                           |                                                           | Tobacco expenditure | 1.301            | (1.206,1.403) |
|                                                           | All Metals in PM <sub>2.5</sub><br>VIF <sup>2</sup> =8.81 | IMD <sup>1</sup>    | 1.183            | (1.07,1.306)  |
|                                                           |                                                           | % Asian             | 0.892            | (0.817,0.973) |
|                                                           |                                                           | % White             | 0.846            | (0.725,0.986) |
|                                                           |                                                           | Tobacco expenditure | 1.301            | (1.214,1.393) |
|                                                           | Lung cancer incidence                                     |                     | IMD <sup>1</sup> | 1.390         |
| All Metals in PM <sub>10</sub><br>VIF =8.60               |                                                           | % Asian             | 0.851            | (0.790,0.916) |
|                                                           |                                                           | % White             | 0.932            | (0.818,1.062) |
|                                                           |                                                           | Tobacco expenditure | 1.472            | (1.366,1.586) |
| All Metals in PM <sub>2.5</sub><br>VIF <sup>2</sup> =7.72 |                                                           | IMD <sup>1</sup>    | 1.404            | (1.276,1.544) |
|                                                           |                                                           | % Asian             | 0.846            | (0.786,0.910) |
|                                                           |                                                           | % White             | 0.955            | (0.839,1.086) |
|                                                           |                                                           | Tobacco expenditure | 1.468            | (1.373,1.569) |

<sup>1</sup>IMD Indices of multiple deprivation  
<sup>2</sup>VIF Variance Inflation Factor

**Table S3:** Pearson Correlation(r) between the adjusted annual mean concentrations of PM-metals and the adjusted annual mean PM concentrations (PM<sub>2.5</sub> and PM<sub>10</sub>).

| N=1533                        |  | PM <sub>2.5</sub> CU | PM <sub>2.5</sub> FE | PM <sub>10</sub> CU | PM <sub>10</sub> FE | PM <sub>10</sub> ZN | PM <sub>2.5</sub> | PM <sub>10</sub> |
|-------------------------------|--|----------------------|----------------------|---------------------|---------------------|---------------------|-------------------|------------------|
| PM <sub>2.5</sub> Correlation |  | 0.86                 | 0.89                 | 0.89                | 0.89                | 0.73                | 1.00              | 0.92             |
| PM <sub>10</sub> Correlation  |  | 0.82                 | 0.87                 | 0.86                | 0.88                | 0.74                | 0.92              | 1.00             |

All the correlation significant at p< 0.001

**Figure S1.** A graphical presentation of the confounding and causal mechanism, linking exposure and adverse health outcomes.

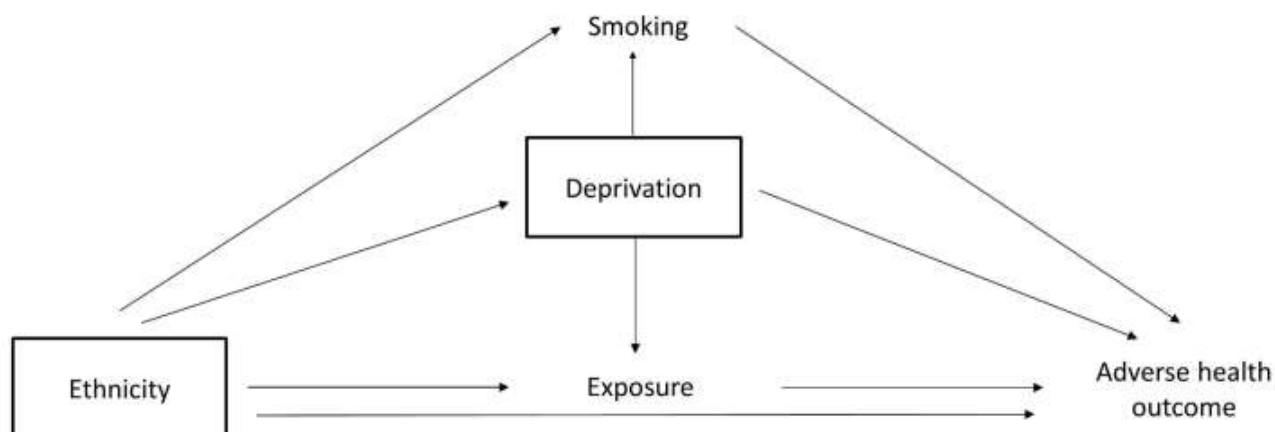

**Figure S2.** Maps of the confounders in quintiles: proportion of Asian people, proportion of white people, modified index of multiple deprivations, and tobacco spends. Contains National Statistics data © Crown copyright and database right 2018; Contains OS data © Crown copyright and database right 2018. All rights reserved.

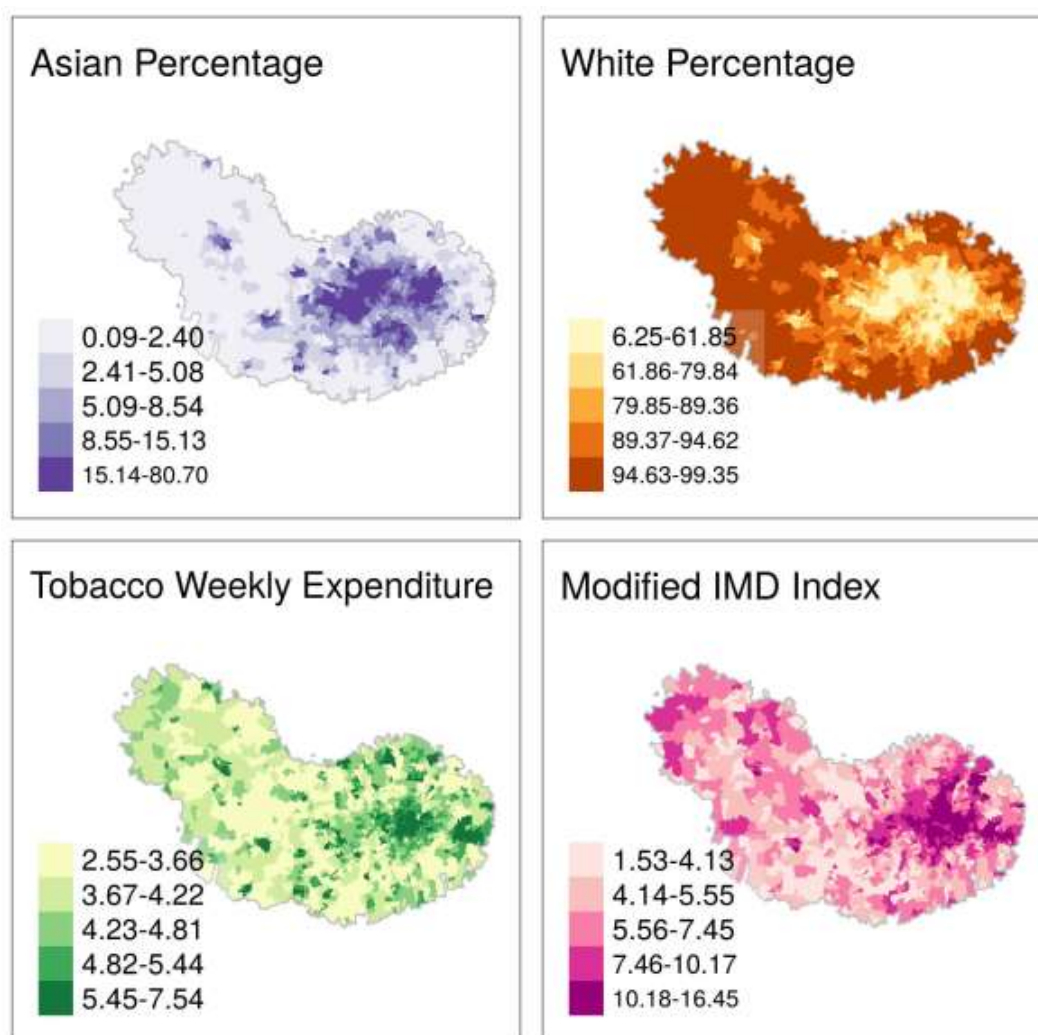

Supplement: inline-supplementary-material-1 [file inline-supplementary-material-1.pdf]
